# Supplementary material for: Accuracy benchmark of the GeneMind GenoLab M sequencing platform for WGS and WES analysis
Source: Research Square preprint supplement (doi:10.21203/rs.3.rs-1402182/v1), 2022-03-07
Supplement: Supplementary file 2 [file 32642bffee9d5ccf468d997f.xlsx]

## Sheet: 1
Table 1 Statistics of the multiple sequencing datasets in our study.
Samples	Library Type	Sequencing Platform	Read (M）	Bases (Gb)	Duplication rate (%)	>Q20	>Q30	Alignment rate (%)	Mean coverage (X)	%_bases_above_15x
GL_WGS_22	WGS	GenoLab M	442.77	66.42	0.0173	0.9535	0.8826	0.9988	22.39	0.813
GL_WGS_33	WGS	GenoLab M	662.66	99.4	0.0193	0.9522	0.8799	0.9988	33.5	0.939
NA_WGS_22	WGS	NovaSeq 6000	424.9	63.73	0.0357	0.9592	0.9005	0.9964	21.37	0.873
NA_WGS_33	WGS	NovaSeq 6000	655.83	98.38	0.0532	0.9592	0.9005	0.9964	32.99	0.977
GL_WES_100	WES Agilent V8	GenoLab M	41.87	6.28	0.06	0.9395	0.8471	0.9995	112.42	0.98
GL_WES_raw	WES Agilent V8	GenoLab M	70.36	10.55	0.0971	0.9395	0.8471	0.9995	188.9	0.99
NA_WES_100	WES Agilent V8	NovaSeq 6000	39.35	5.9	0.1485	0.9801	0.9405	0.9995	107.72	0.993
NA_WES_raw	WES Agilent V8	NovaSeq 6000	81.16	12.17	0.2678	0.9801	0.9405	0.9995	222.19	0.996
NT_WES_100	WES Agilent V8	NextSeq 550	37.54	5.56	0.0567	0.8662	0.7906	0.9983	101.13	0.993
NT_WES_raw	WES Agilent V8	NextSeq 550	131.76	19.5	0.1754	0.8661	0.7906	0.9983	354.92	0.996
